# Supplementary material
Source: PubMed Central journal article supplement (PMC4054277)
Supplement: EC.00054-14_zek999094294so1.pdf [file EC.00054-14_zek999094294so1.pdf]

## Wang *et al* Supplemental Information

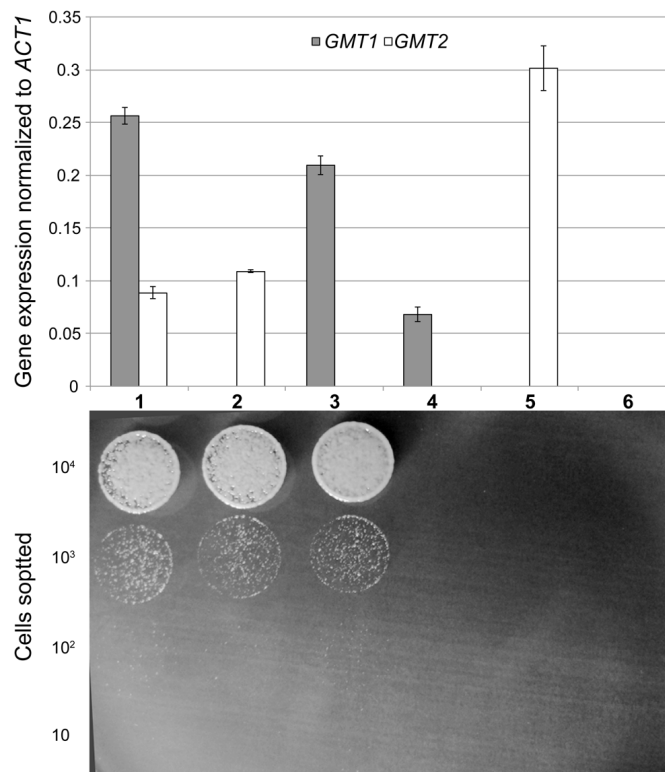

**Supplemental Figure S1.** Top, RNA expression of *GMT* genes in rich medium. The indicated strains, labeled as in Fig. 8, were grown at 30 °C in YPD medium and analyzed by qRT-PCR as in the Experimental Procedures. Bottom, 5- $\mu$ l aliquots of a  $2 \times 10^6$  cells/ml stock and 10-fold serial dilutions of the indicated strains were spotted on YPD medium containing 0.01% SDS at 30 °C.

**Supplemental Table S1.** Primers used in these studies.

| <b>Name</b> | <b>Serotype</b>                                                   |
|-------------|-------------------------------------------------------------------|
| GMT2-1      | ATCTTGGCGGGCGATAACTATGGGGA                                        |
| GMT2-2      | CGCCTTGCTTTCTCCCCCTCTC                                            |
| GMT2-3      | GAAAGCAAGGCGGATTACAAGGATGACGACGATAAGATCTC-<br>TAATGTTTGTGGTGTGTGG |
| GMT2-4      | GAGTGATCCACTAGTTCTAGGAGTCA                                        |
| GMT2-5      | CTGAAATCTTCAGATGACTCCTAGAA                                        |
| GMT2-6      | GGATTATTAGGAATACTACAGCCGCG                                        |
| GMT2-7      | GCACATCACATGGTTGCGCGGCTGTA                                        |
| GMT2-8      | CGGACAGTACAACGGGCATATCG                                           |
| Gmt1-7      | CCAGGCTGGGTGAGTCGCTTG                                             |
| Gmt1-4b     | CATGGTCATAGCTGTTTCCTGGTCGGCGTGGA ACTCTGCTGC                       |
| Gmt1-5b     | CACTGGCCGTCGTTTTACAACGGACTACGTTTGGTGATGAT                         |
| Gmt1-8      | GATAATCGGATTTGTATGTCG                                             |
| Gmt1-3b     | GCAGCAGAGTTCCACGCCGACCAGGAAACAGCTATGAC-<br>CATG                   |
| Gmt1-6      | ATCATCACCAAACGTAGTCCGTTGTAAAACGACGGCCAGTG                         |
| Gmt2-7      | GGCGGGCGATAACTATGGG                                               |
| Gmt2-4      | CATGGTCATAGCTGTTTCCTGGCGTGGATAGA-<br>GAAACGAAAAG                  |
| Gmt2-5b     | CACTGGCCGTCGTTTTACAACGTCTGTGCTGTGTGGTGTGTC                        |
| Gmt2-8      | GGTGGATAAAGATGAGAGG                                               |
| Gmt2-3      | CTTTTCGTTTCTCTATCCACGCCAGGAAACAGCTATGAC-<br>CATG                  |
| Gmt2-6      | GACACCACACAGCACAGACGTTGTAAAACGACGGCCAGTG                          |
| GMT1CB-A    | CTCTGGATCGTACATGCCCCC                                             |
| GMT1CB-B    | GCTTGATATCGAATTCCTGCAGCCCGATCATCACCAAACG-<br>TAGTCC               |
| GMT1CB-G    | GCTCTCCAGCTCACATCCTCGCAGCACATTGTGCAAAGCG-<br>GGATTA               |
| GMT1CB-H    | GCCCCAATTCTCCTCCG                                                 |
| GMT1CB-C    | CGGGCTGCAGGAATTCGATATCAAGC                                        |
| GMT1CB-D    | GGTAAGCCGTGTTCGTC AAGAGTGG                                        |
| GMT1CB-E    | GCTCATGTAGAGCGCCTGCTC                                             |
| GMT1CB-F    | GCTGCGAGGATGTGAGCTGG                                              |
| ZAW-117     | TCCAAACCTTTTCGTGCCACA                                             |
| ZAW-118     | CACAAACATTAGATTATGGCCTACCACCCGCGGCC                               |
| ZAW-115     | GATCACATGGTGAGTATAATGGA                                           |
| ZAW-116     | TGTGGGCACGAAAGGTTTGGACATGGCTTGGGCGTGGATA-<br>GAGGA                |
| ZAW-119     | CCAGCTCACATCCTCGCAGCTTTTTTCTGTAAATGGGATTG-<br>GA                  |
| ZAW-120     | GCTTCATCACCCGTTCCCG                                               |
| ZAW-114     | TAATCTAATGTTTGTGCGGGCTGCAGGAATTCGATATCA                           |

ZAW-078 CCACTCTTGACGACACGGCTTACC  
ZAW-128 ATGGCCTCCTACACCCCCTCCT  
ZAW-129 CTGTTTTTCAAAGCACCTCACGCCTTGCTTTCTCCCCCTCT  
ZAW-126 GGCCTAGCCGTATGGATATGGC  
ZAW-127 AGGAGGGGGTGTAGGAGGCCATGGTGCCGGGATGGTTATTC  
ZAW-134 TCGCAGCCTGGACAATAGAAGCTGGGACCAGAAG-  
TACGTTTG  
ZAW-135 GTGCAGAAGAATTACGGGAGTC  
ZAW-130 GTGAGGTGCTTTTGA AAAACAGAGCTTGGGGGACAGATGATA  
ZAW-131 CGCTTGGGTGGAGAGGCTATTC  
ZAW-132 GCCCATTCGCCGCCAAG  
ZAW-133 AGCTTCTATTGTCCAGGCTGCGA  
ZAW-117 TCCAAACCTTTCGTGCCACA  
ZAW-166 GTCTCCCCGCTCGCCCAT  
ZAW-063 GGCACGTGATGGCCTCCTACACCCCCTCCT  
ZAW-137 CTTCTCATCCTTCGCACCAT  
ZAW-171 CCACACTGTCCCCATCTACGA  
ZAW-172 CAGCAAGGTGATACGGAGGAT

---
